# Supplementary material
Source: Springer Nature journal article supplement (https://www.springermedizin.de/resource/supplementary/12936_2011_1752_MOESM1_ESM.pdf/9541660)

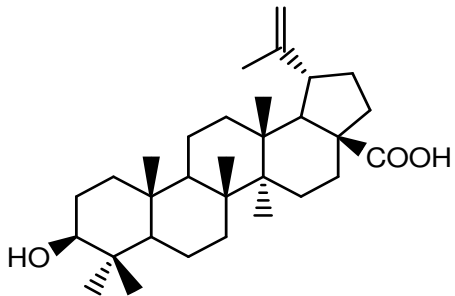

**HLT1**

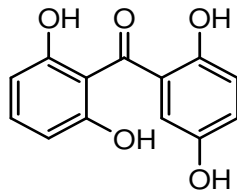

**HLT2**

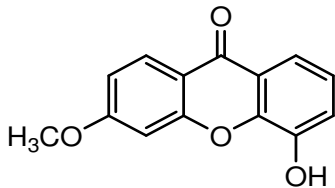

**HLT3**

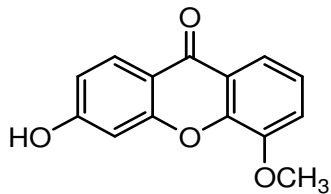

**HLT4**

Supplement: MOESM1 [file 9541660]
